# Supplementary material for: Contrasting impacts of two types of El Niño events on winter haze days in China's Jing-Jin-Ji region
Source: Copernicus journal article supplement (doi:10.5194/acp-2019-1215), 2020-03-17
Supplement: Supplementary file 1 [file acp-2019-1215-supplement.pdf]

*Supplement of*

**Contrasting impacts of two types of El Niño events on winter haze days in China's Jing-Jin-Ji region**

Xiaochao Yu et al.

5

*Correspondence to:* Zhili Wang (wangzl@cma.gov.cn)

10

15

20

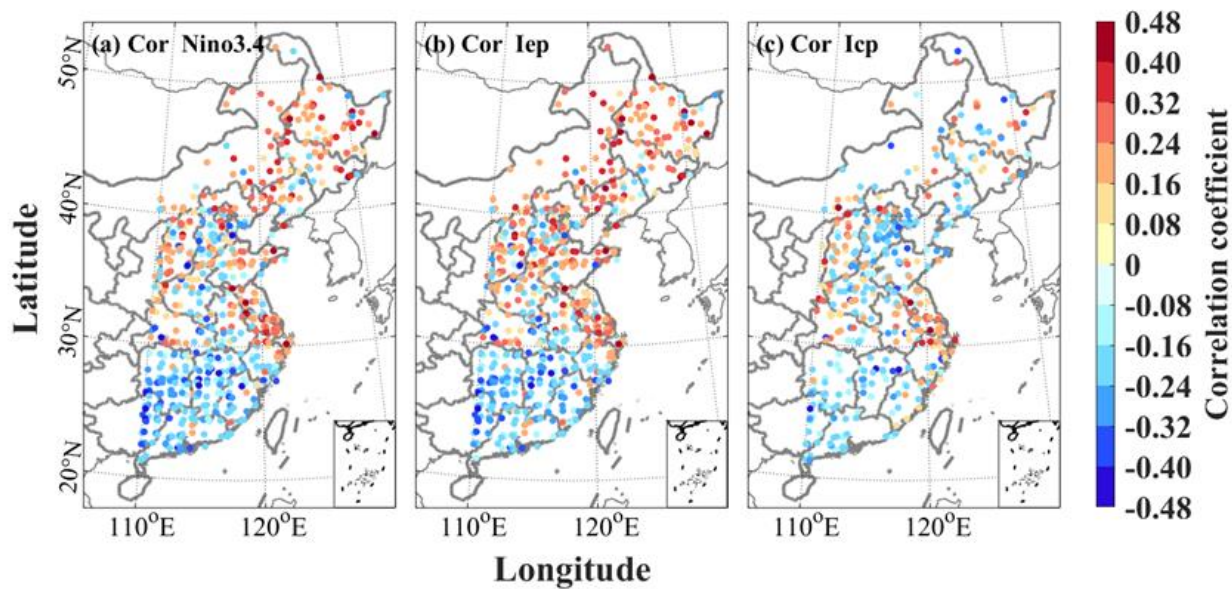

Figure S1: Correlation coefficients between the time series of site-observed winter haze days in eastern China (east of 110°E) and (a) INiño3.4, (b) Iep, and (c) Icp indices. Only the sites where the correlations pass a 90% significance level are shown.

5

10

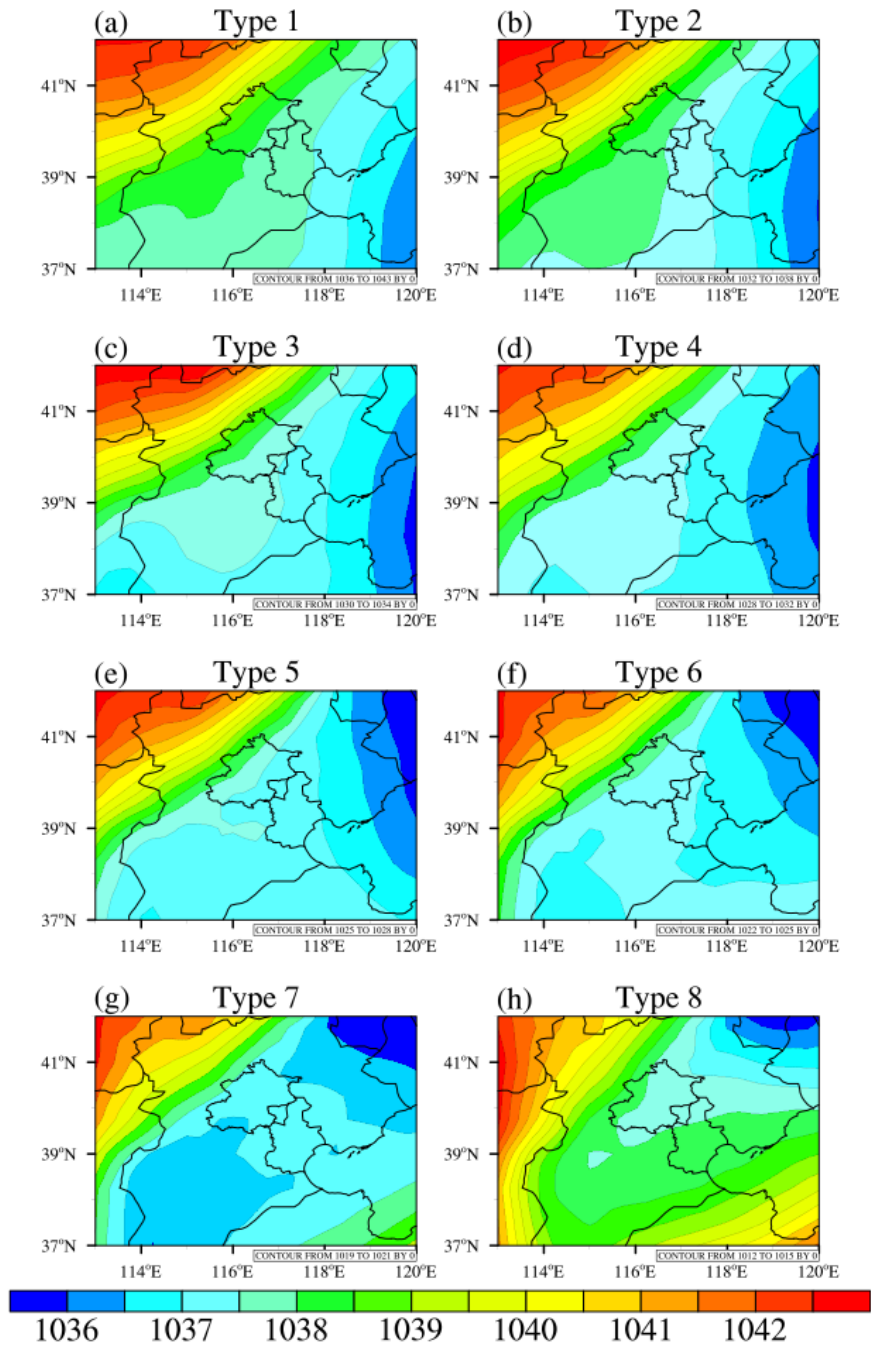

Figure S2: Climatological distributions of SLP (unit: hPa) over JJJ region in winter for eight circulation types. Thank Dr. Yongjie Huang (Institute of Atmospheric Physics, Chinese Academy of Sciences, IAP/CAS) for providing map database (<https://coding.net/u/huangynj/p/NCL-Chinamap/git>).

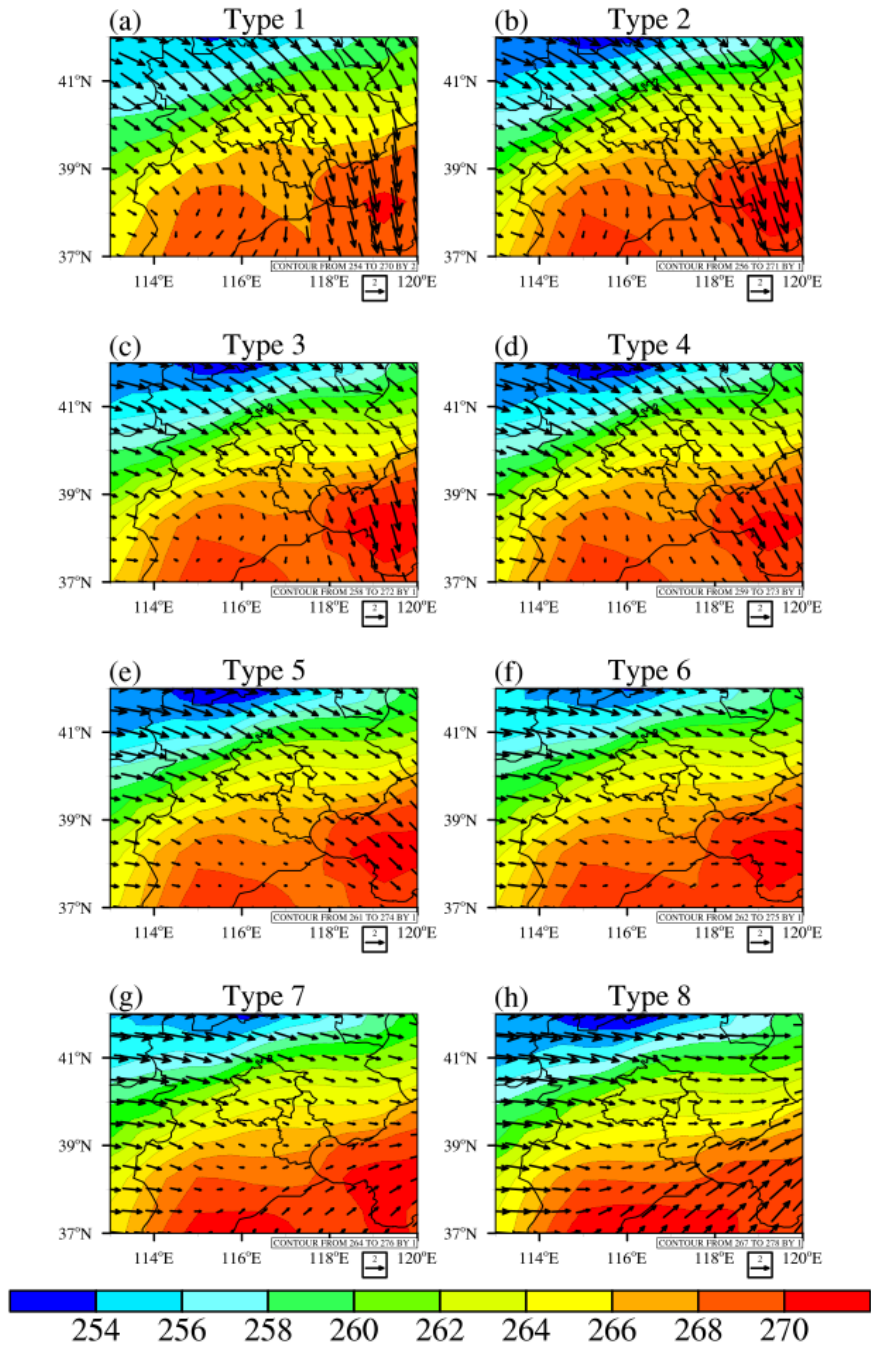

**Figure S3: Climatological distributions of temperature at 2 meter (contours, unit: K) and wind at 10 meter (arrows, unit:  $\text{m s}^{-1}$ ) over JJJ region in winter for eight circulation types. Thank Dr. Yongjie Huang (Institute of Atmospheric Physics, Chinese Academy of Sciences, IAP/CAS) for providing map database (<https://coding.net/u/huangynj/p/NCL-Chinamap/git>).**
